# Supplementary material
Source: PubMed Central journal article supplement (PMC156716)
Supplement: nar_31_11_2873__1.pdf [file nar_31_11_2873__1.pdf]

## Supplementary Material

### Oligonucleotides and plasmid constructs

The oligonucleotides used in this study are listed in table 1. The two-hybrid constructs were generated in vectors pEG202, pJG4-5 or pJG4-5Y (pJG4-5 in which a polylinker has been introduced between the *EcoRI* and *XhoI* restriction sites), a kind gift from Drs. C. Antoniewski and J-Y. Roignant. The cDNAs were amplified using DyNAzyme™ EXT DNA polymerase (Finnzymes), subcloned as indicated below and sequenced.

Primers *corto1-s* and *corto550-as* were used to generate the full-length *corto* cDNA. The amplification product was subcloned as a *BamHI/EcoRI* fragment in pBluescript and in pGEX4T-1 in frame with the GST domain. It was also subcloned as an *EcoRI*/blunt fragment in pJG4-5 in frame with the activation domain B42 of *E.coli* and in pEG202 in frame with the LexA DNA binding domain. These constructs were designated pBS-Corto, pGEX-Corto, pEG-Corto and pJG-Corto, respectively. Plasmid pEG-Corto was digested by *PvuII* and *SallI*, then treated with Klenow polymerase and religated to give plasmid pEG-C1/324 which encodes amino-acids 1 to 324 of Corto. The region corresponding to amino-acids 107 to 203 was amplified using primers *corto127-s* and *corto203-as* and subcloned as a *BamHI/EcoRI* fragment in pGEX4T-1 and as an *EcoRI*/blunt fragment in pEG202 to give plasmids pGEX-C127/203 and pEG-C127/203. The region corresponding to amino-acids 440 to 550 was amplified with primers *corto440-s* and *corto550-as*. The resulting fragment was subcloned as an *EcoRI*/blunt fragment in pEG202 to give plasmid pEG-C440/550.

EST SD03549, which contains the *esc* cDNA, was digested by *AsuII*, blunt-ended with Klenow polymerase, and digested with *XhoI*. The resulting 1.6 kb fragment, which corresponds to the full-length ESC cDNA, was sub-cloned in pJG4-5 previously digested with *SmaI* and *XhoI* to give plasmid pJG-ESC. The full-length *esc* cDNA was also amplified using primers *esc2-s* and *esc425-as*. It was subcloned as a blunt/*XhoI* fragment in pJG4-5Y

previously digested with *Sma*I and *Xho*I. Sequencing of this subclone revealed two mutations in the *esc* cDNA. The first mutation leads to the substitution of the glutamic acid at position 125 by a glycine and the second one to the substitution of the leucine at position 142 by a phenylalanine (E125G, L142F). This clone was named pJG-ESC\*. The full-length *E(z)* cDNA was amplified using primers E(z)1-s and E(z)760-as and subcloned as an *Eco*RI/blunt fragment in pJG4-5 to give plasmid pJG-E(Z). This construct was digested by *Sgr*AI and *Sma*I, then treated with S1 nuclease and religated to obtain pJG-E(Z)1/315 which encodes amino-acids 1 to 315 of E(Z). pJG-E(Z) was also digested by *Eco*RI and *Xma*I, then treated with Klenow polymerase and religated to obtain pJG-E(Z)315/760 which encodes amino-acids 315 to 760 of E(Z). The E(Z) SET domain was amplified using primers E(z)601-s and E(z)760-as. This fragment was subcloned as an *Eco*RI/blunt fragment in pJG4-5 to give plasmid pJG-E(Z)SET. The full-length *Pc* cDNA was amplified using primers Pc1-s and Pc390-as and subcloned as an *Eco*RI/blunt fragment in pJG4-5 to give plasmid pJG-PC. The full-length *Scm* cDNA was amplified using primers Scm1-s and Scm877-as and subcloned in pJG4-5 as an *Eco*RI/blunt fragment to give plasmid pJG-SCM. The full-length *Trl* cDNA was amplified using primers Trl1-s and Trl519-as and subcloned as a *Bg*III/blunt fragment in pJG4-5Y to give plasmid pJG-GAGA. The region coding the GAGA BTB/POZ domain was amplified using primers Trl1-s and Trl99-as. This fragment was subcloned as a *Bg*III/blunt fragment in pJG4-5Y to give plasmid pJG-GAGABTB.

### **Yeast strains**

The yeast strains were transformed using the displayGREEN<sup>TM</sup> transformation kit (Display systems Biotech). The bait strain RFY231 (*MAT $\alpha$  trp1 $\Delta$ ::hisG his3 ura3-1 leu2::3Lexop-LEU2*) was co-transformed with the URA3 pSH18-34 plasmid, which contains the *LacZ* reporter gene under the control of eight LexA binding sequences and the minimal TATA region from the *GAL1* promoter, and with the HIS3 pEG202 bait constructs expressing LexA-tagged Corto or Corto sub-domains (pEG-Corto, pEG-C127/203 and pEG-C440/550). As

pEG-C1/324 activates the *LacZ* reporter gene of pSH18-34 by itself, it was introduced into strain EGY48SH $\Delta$ Spe (*MAT $\alpha$  his3 trp1 ura3 6LexAop-LEU2*) which contains a single copy of the *LacZ* gene integrated in the yeast genome. In that strain, no trans-activation of *LacZ* by pEG-C1/324 could be detected. The prey strain RFY206 (*MAT $\alpha$  ura3-52 his3 $\Delta$ E200 leu2-3 lys2 $\Delta$ E201 trp1::hisG*) was transformed with the different TRP1 prey plasmids derived from pJG4-5 and pJG4-5Y and expressing the B42 activation domain-tagged Corto, PcG and GAGA constructs (pJG-Corto, pJG-ESC, pJG-ESC\*, pJG-E(Z), pJG-E(Z)SET, pJG-E(Z)1/315, pJG-E(Z)315/760, pJG-PC, pJG-PH, pJG-PH $\Delta$ N, pJG-PH $\Delta$ S, pJG-SCM, pJG-GAGA and pJG-GAGABTB).

TABLE 1. Oligonucleotides used for subcloning

|             |                                          |
|-------------|------------------------------------------|
| corto1-s    | 5'-ACGATGACGATGGCCGCTGTTATGCCACCTACG-3'  |
| corto127-s  | 5'-ACTGCCAGCAGCAACAGCAACACAGCCCC-3'      |
| corto203-as | 5'-CACCGCCCGCGCGGTTCGCATGC-3'            |
| corto325-s  | 5'-GCTGCGGCCAGGCTCGATAGCC-3'             |
| corto440-s  | 5'-GGCCCTGACACCAATCCC-3'                 |
| corto550-as | 5'-CACGTTGTAGCAGGAGATCTGCGG-3'           |
| esc2-s      | 5'-CAGCAGTGATAAAGTGAAAAACGGCAACGAGCCC-3' |
| esc425-as   | 5'-TCAGATGGAAGTTGTTTGTCTGCG-3'           |
| E(z)1-s     | 5'-AATAGCACTAAAGTGCCGCCCGAGTGG-3'        |
| E(z)760-as  | 5'-TCAAACAATTTCCATTTACGCTCTATGCCC-3'     |
| E(z)601-s   | 5'-CAGGCTGCGGAGCGGATCAGTTTAAGC-3'        |
| Pc1-s       | 5'-ACTGGTCGAGGCAAGGGGAGTAAGG-3'          |
| Pc390-as    | 5'-TCAAGCTACTGGCGACGAATCGCC-3'           |
| Scm1-s      | 5'-TCGGGCGGACGTGATAGCAGTACC-3'           |
| Scm877-as   | 5'-GAGTGCCAGATTATTTTCGACGACCATTGACC-3'   |
| Trl1-s      | 5'-TCGCTGCCAATGAATTCGCTGTATTCG-3'        |
| Trl519-as   | 5'-CTGCGGCTGCGGCTGTTGCTGCTGCGG-3'        |
| Trl99-as    | 5'-GGCGTGATCCACGCTCACCTCTCCGCG-3'        |

Adapters (*Bam*HI: *cgcggatccg*, *Eco*RI: *cggaattcgg*, *Nco*I: *catgcatggcatg*, *Bgl*II *ggaagatcttc*, *Xho*I: *ccgctcgagcgg*) were added at their 5' ends as indicated in Materials and Methods
